# Supplementary material for: Gas-Particle Partitioning of Semivolatile Organic Compounds When Wildfire Smoke Comes to Town
Source: Copernicus journal article supplement (doi:10.5194/egusphere-2023-1419), 2023-07-03
Supplement: Supplementary file 1 [file egusphere-2023-1419-supplement.pdf]

## Supplement for

# Gas-Particle Partitioning of Semivolatile Organic Compounds When Wildfire Smoke Comes to Town

Yutong Liang\*, Rebecca A. Wernis, Kasper Kristensen, Nathan M. Kreisberg, Philip L. Croteau,  
5 Scott C. Herndon, Arthur W.H. Chan, Nga L. Ng, Allen H. Goldstein\*

Emails: Yutong Liang (yutong.liang@berkeley.edu); Allen Goldstein (ahg@berkeley.edu)

This Supplement contains:

|    |                                                                                                              |    |
|----|--------------------------------------------------------------------------------------------------------------|----|
|    | <b>S1. SV-TAG and cTAG chemical analysis and QA/QC</b> .....                                                 | 2  |
| 10 | <b>S2. Liquid vapor pressure estimation</b> .....                                                            | 5  |
|    | <b>S3. Estimation of O/C and H/C ratios, <math>H^+</math>, and aerosol liquid water content (ALWC)</b> ..... | 6  |
|    | <b>S4. AIOMFAC simulations</b> .....                                                                         | 7  |
|    | <b>S5. Random forest model for the temporal variations of <math>F_p</math></b> .....                         | 9  |
|    | <b>S6. Supplementary figures</b> .....                                                                       | 11 |
| 15 | <b>References</b> .....                                                                                      | 25 |

## S1. SV-TAG and cTAG chemical analysis and QA/QC

20 In both SV-TAG and cTAG, following collection of aerosol on the filter cells, the analytes were thermally desorbed in helium saturated with N-methyl-N-(trimethylsilyl) trifluoroacetamide (MSTFA) to convert the -OH groups of the SVOCs into -OSi(CH<sub>3</sub>)<sub>3</sub> groups, which makes them less polar and better suited for the non-polar GC columns. After passing through the GC, analytes were detected by the mass spectrometer. Figure S1 shows representative total ion chromatograms of the bypass and denuded samples for the wildfire period and background period.

25

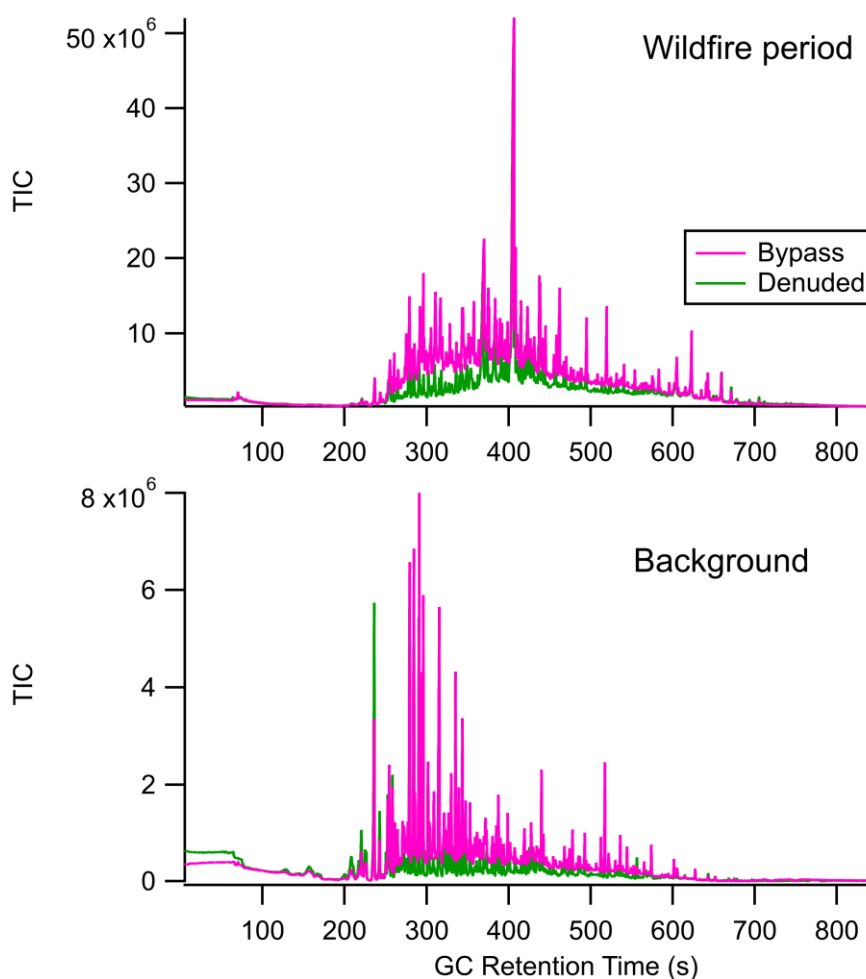

**Figure S1.** Total Ion Chromatogram of a wildfire sample and a background sample. GC retention time has a negative association with volatility (Isaacman-VanWertz et al., 2016).

30

Chromatographic data were analyzed using the TERNinIgor software by fitting the single ion peaks (Isaacman-VanWertz et al., 2017). A constant amount of isotopically labeled internal standards were injected to correct for drifts in instrument response, and known amounts of a mix of 99 compounds (Jen et al., 2019; Liang et al., 2021) were injected as standards for  
35 quantification purpose. Compounds were identified by matching with standard, the NIST 2020 mass spectral library, custom libraries made in previous studies (Jen et al., 2019; Zhang et al., 2018; Yee et al., 2018), and the mass spectra of filter samples collected outside the same building during the 2017 Northern California wildfires (Liang et al., 2021). We only considered  
40 compounds detected in at least 20% of the samples (only 4 out of the 89 compounds considered are present in less than 50% of samples in the 2017 Northern California dataset). More information about materials and methods is in Table S1.

Method blanks were performed by injecting deuterated internal standard to the cells. We determined the background signals of the compounds and calculated the ratio of background  
45 signal to mean bypass signal. Compounds with background-to-bypass signal larger than 10% (such as biphenyl and salicylic acid) were not considered in the analyses. There were another two compounds with background-to-bypass ratios larger than or equal to 5% (5.0% for catechol and 9.0% for 4-hydroxybenzoic acid). They were still included in the analysis. The same criterion is applied for the FIREX-AQ 2018 dataset, and fluoranthene was excluded from the analysis as a  
50 result. In addition, bypass signal data below the  $3\times$ background signal of each compound were not included in the analysis, while denuded signal data within this limit were kept.

For SV-TAG measurement, because two cells were used for sampling, the cell-to-cell bias needs to be accounted for. During sampling, the role of the two cells were swapped with each sample.  
55 For instance, if Cell 1 sampled gas + particle and Cell 2 sampled particle in Hour 1, then in Hour 2, Cell 1 would sample particle while Cell 2 would sample gas + particle. In addition, we collected 11 bypass samples simultaneously on two cells as a direct comparison during this campaign. Linear regression of the internal-standard-normalized signals of each compound measured from the two cells were performed, and the best-fit slopes were used to correct for the  
60 cell difference for each compound. More details can be found in Isaacman et al. (2014) and its Supplement.

The carryover from cell to cell can cause a positive bias to measured  $F_p$ . The magnitude of carryover has been systematically studied in Kreisberg et al. (2014). The carryover of total ion chromatogram was found to be  $2.6 \pm 0.1\%$  and the median carryover of individual ions was found to be 2.4%. We can estimate the effect of carryover on  $F_p$  and  $C^*$  as follows:

The real gas-phase fraction of a compound  $F_{p-real}$  can be expressed as:

$$F_{p-real} = \frac{C_{g-real}}{C_{(g+p)-real}} \quad (\text{Eq. S1})$$

Assume the carryover of the compound is 2.6%. Then the measured gas-phase fraction ( $F_{p-meas}$ ) can be expressed as:

$$F_{p-meas} = \frac{C_g + C_{g+p} \times 0.026}{C_{g+p} + C_g \times 0.026} = \frac{F_{p-real} + 0.026}{0.026F_{p-real} + 1} \quad (\text{Eq. S2})$$

We can then plot  $F_{p-real}$  and (uncorrected  $C^*$  / corrected  $C^*$ ) as functions of  $F_{p-meas}$ . This ratio is the same as the bias of  $\gamma$ .

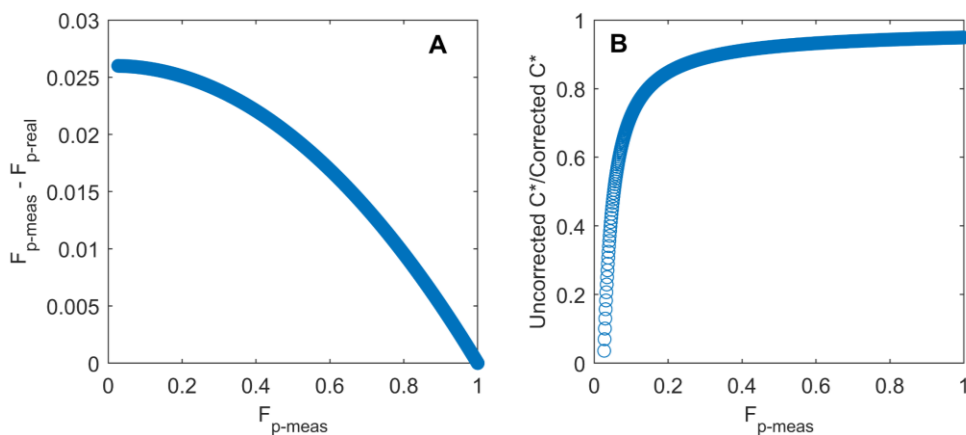

**Figure S2. A.** Overestimation of  $F_p$  because of carryover, as a function of  $F_{p-meas}$ ; **B.** the ratio of inferred  $C^*$  (without correction from carryover) over inferred  $C^*$  (after correction of carryover), as a function of  $F_{p-meas}$ .

As Figure S1 suggests, the effect of carryover on  $F_p$  is negligible. However, when  $F_{p-meas}$  is less than 0.05,  $C^*$  can be underestimated by a factor of  $1/2$ . When  $F_{p-meas}$  is less than 0.03,  $C^*$  can be underestimated by an order of magnitude. Therefore, compounds with median  $F_p$  less than 0.05 were not included in activity coefficient analysis.

**Table S1.** Materials and Methods for SV-TAG and cTAG (SV channel only) analysis

85

|                                                   | <b>SV-TAG</b>                                                                             | <b>cTAG</b>                                                                                     |
|---------------------------------------------------|-------------------------------------------------------------------------------------------|-------------------------------------------------------------------------------------------------|
| Denuder                                           | MAST Carbon, 500 channels,<br>30 mm outer diameter × 40.6<br>cm length                    | MAST Carbon, 500 channels,<br>30 mm outer diameter × 40.6<br>cm length (same as SV-TAG)         |
| Collection and thermal<br>desorption temperatures | 30°C, 320°C                                                                               | 30°C, 315°C                                                                                     |
| GC and column                                     | Agilent 7890A; Rtx-5Sil MS,<br>20 m × 0.18 mm × 0.18 μm<br>(Restek)                       | Miniature GC; metal MXT-5,<br>20 m, 0.18mm i.d., 2μm<br>phase thickness (Restek)                |
| GC method                                         | 23.6 °C min <sup>-1</sup> ramp from<br>50°C to 330°C, 2.2 min hold<br>at 330°C in Helium. | 1 min hold at 50°C, 20 °C<br>min <sup>-1</sup> ramp to 330°C, 4 min<br>hold at 330°C in Helium. |
| Mass spectrometer                                 | Agilent 5975C, EI, -70 eV                                                                 | TOFWERK HR MS, EI, -70<br>eV                                                                    |

**S2. Liquid vapor pressure estimation**

The subcooled liquid vapor pressures were estimated by two group contribution models, i.e., the  
90 SIMPOL model and the EVAPORATION model (which only works for non-aromatic  
compounds) (Pankow and Asher, 2008; Compernelle et al., 2011). For the compounds  
considered here, we found that the predictions from the two models agree well with each other.  
The linear regression between  $\log_{10}(P_{\text{SIMPOL}})$  and  $\log_{10}(P_{\text{EVAPORATION}})$  yields an  $R^2$  of 0.97 and  
root mean square error of 0.44. Such a difference did not meaningfully change any of our results.  
95 Therefore, the results presented in this manuscript are based on vapor pressures estimated by the  
SIMPOL model. In addition, similar to our previous work, we used the MPBPWIN component  
(modified Grain method) in EPA's EPI Suite (US EPA, 2012) to estimate the vapor pressures of  
nitro-aromatic compounds, because the SIMPOL model substantially overestimate the vapor

pressures of these compounds in general (Bannan et al., 2017; Wania et al., 2017). The saturation  
100 vapor pressure  $v_{P,i}$  (in Pa) of each compound was converted to the saturation mass concentration  
over pure compound  $i$ ,  $C_i^O$  at 298K by:

$$C_i^O = \frac{v_{P,i} MW_i}{RT} \quad (\text{Eq. S3})$$

where  $R$  is the gas constant ( $8.314 \text{ J mol}^{-1} \text{ K}^{-1}$ ),  $T$  is the temperature, 298K.  $MW_i$  is the  
molecular weight of compound  $i$  in  $\text{g mol}^{-1}$ .  $C_i^O$  was then converted into  $\mu\text{g m}^{-3}$ .

105 For Figure 2, the effective saturation mass concentration of compound  $i$  ( $C_i^*$ ) at a given  
temperature was converted to 298K values using the Clausius-Clapeyron Equation (Epstein et al.,  
2010):

$$C_i^*(298K) = C_i^*(T) \exp\left[\frac{\Delta H_{vap,i}}{R} \left(\frac{1}{T} - \frac{1}{298K}\right)\right] \frac{T}{298K} \quad (\text{Eq. S4})$$

110 where  $\Delta H_{vap,i}$  is the enthalpy of vaporization of compound  $i$ ,  $T$  is the temperature in Kelvin. The  
enthalpy data were taken from the NIST Webbook (NIST, 2022), May et al. (2012), or estimated  
by the equation in May et al. (2013) and Thornton et al. (2020) (and take average) when  
measured data were not available.

### S3. Estimation of O/C and H/C ratios, $H^+$ , and aerosol liquid water content (ALWC)

115 In the FIREX-AQ 2018 study, the O/C ratio and H/C ratios were estimated from the fractions of  
 $m/z$  44 and  $m/z$  43 signals in the total organic signal measured by the ACSM, following the  
parametrizations by Aiken et al. (2008) and Ng et al. (2011), respectively.

The mass concentration of  $H^+$  in the particle phase of particle per unit volume of air was  
120 estimated by assuming charge neutrality (Zhang et al., 2007):

$$H^+ = 2 \times SO_4^{2-} / 96 + NO_3^- / 62 + Cl^- / 35.5 - NH_4^+ / 18 \quad (\text{Eq. S5})$$

where  $SO_4^{2-}$ ,  $NO_3^-$ ,  $Cl^-$ , and  $NH_4^+$  are the mass concentrations of the aerosol components  
measured by the ACSM.

125 The total ALWC is the sum of the inorganic water content caused by inorganic ions, and the  
organic water content caused by the uptake of water by the hygroscopic organic aerosol. The

inorganic water content was estimated using the ISOPORRIA-II model (Fountoukis and Nenes, 2007) in reverse mode, assuming a metastable phase state, following the settings by Isaacman-VanWertz et al. (2016). The organic water content was estimated following the approach by Guo et al. (2015).

$$W_o = M_{org} \frac{\rho_{org} \kappa_{org} (O/C)}{\rho_w \frac{100}{RH\%} - 1} \quad (\text{Eq. S6})$$

where  $M_{org}$  is the mass concentration of organic aerosol measured by the ACSM,  $\rho_{org}$  and  $\rho_w$  are the densities of organic aerosol and water, respectively. RH is the relative humidity. The estimation of O/C ratio is described above. The organic hygroscopicity parameter  $\kappa_{org}$  is assumed to be 0.2 for aged BBOA (Engelhart et al., 2012). Due to the low RH during the wildfire season, the aerosol water content caused by organic aerosol dominated the total aerosol liquid water content (mean  $\pm$  standard deviation = 74%  $\pm$  15%).

#### S4. AIOMFAC simulations

To elucidate the effect of BBOA on the partitioning behavior of urban SVOCs observed in Berkeley, we calculated the activity coefficients ( $\gamma$ ) using the Aerosol Inorganic-Organic Mixtures Functional groups Activity Coefficients (AIOMFAC) model (Zuend et al., 2011). Since we did not have bulk composition measured, aerosol compositions from relevant studies in literature were used. We parsimoniously assumed that the aerosol measured on campus was composed of urban OA, BBOA, and water. Inorganic species were ignored. The urban aerosol composition (cooking OA, hydrocarbon-like OA (HOA), and less-oxidized oxygenated organic aerosol (LOOOA)) was taken from a mobile measurement study in Oakland, California (a city adjacent to Berkeley) (Shah et al., 2018). The surrogate compound for cooking OA was based on Faber et al. (2017). The BBOA surrogates were taken from Pye et al. (2018). with the addition of dehydroabietic acid. We performed two sets of simulations, with the aerosol components and their mass fractions shown in Table S2. In the High RH set of simulations, we assumed that 10% of aerosol was water. We increased the mass fraction of BBOA from 6% to 86% of total aerosol, while the mass fraction of urban OA decreased from 84% of total aerosol to 4% of total aerosol. The resulting RH was 78% to 39% from urban OA dominance to BBOA dominance. In the low RH case, we assumed the mass fraction of water to be 5% of total aerosol, increased the BBOA

from 11% to 91% while decreased the urban OA from 84% to 4%. The resulting RH in the low RH case was 45% to 19% from urban OA dominance to BBOA dominance.

160 **Table S2.** Aerosol components, surrogate structures, O/C ratio of the surrogate structures and the mass fractions of the aerosol components used in the AIOMFAC simulations.

| Aerosol component     | Surrogate in AIOMFAC                                                                                                                 | O/C  | Amount by mass                        |
|-----------------------|--------------------------------------------------------------------------------------------------------------------------------------|------|---------------------------------------|
| Cooking OA            | $(\text{CH}_3)_2(\text{CH}_2)_{13}(\text{CH}_2^{\text{[OH]}})(\text{CH}=\text{CH})(\text{COOH})(\text{OH})$                          | 0.16 | 0.6×LOOOA                             |
| HOA                   | $(\text{CH}_3)_2(\text{CH}_2)_{18}$                                                                                                  | 0    | 0.4×LOOOA                             |
| LOOOA                 | $(\text{CH}_3)_2(\text{CH}_2)(\text{CH})(\text{CH}_2^{\text{[OH]}})_2(\text{CH}^{\text{[OH]}})(\text{C}^{\text{[OH]}})(\text{OH})_4$ | 0.5  | 42%-2% of total aerosol               |
| BBOA w/o levoglucosan | $(\text{CH}_2)(\text{CH})(\text{CH}^{\text{[OH]}})_2(\text{CH}_2\text{O})(\text{CHO}[\text{ether}])(\text{OH})_2$                    | 0.67 | 6%-83% of total aerosol               |
| Levoglucosan          | Levoglucosan                                                                                                                         | 0.83 | 0.03×BBOA w/o levoglucosan            |
| Dehydroabietic acid   | Dehydroabietic acid                                                                                                                  | 0.1  | 0.005×BBOA w/o levoglucosan           |
| Water                 | Water                                                                                                                                | + ∞  | Remaining 10% (5% in the low RH runs) |



## S5. Random forest model for the temporal variations of $F_p$

We tried to use random forest models to find out what are the most important factors controlling the temporal variations of the partitioning behaviors of individual SVOCs. We sought to use various measured variables, such as temperature and relative humidity (predictors) to predict the time series of  $F_p$  of individual compounds (response). Random forest algorithm, developed by Leo Breiman (Breiman, 2001), is an ensemble approach that makes prediction of the response using the aggregation of multiple decision trees. We used the bootstrap aggregation (bagging) method, in which each decision tree in the ensemble was trained on a random subset of the samples (with replacement), and the prediction results from the individual decision trees were then averaged to make more accurate predictions. This approach reduces the chance of overfitting by individual decision trees and therefore enhances prediction accuracy (Mecikalski et al., 2021). It can also be used to evaluate the importance of predictor variables on their contribution in predicting the response variable.

The random forest model was implemented with MATLAB 2022a, using 200 learning cycles. We set the number of predictors to select for each split to “all” to use all available predictors. The “interaction-curvature” algorithm was used to select the best split predictor at each node, and we allowed the use of the best surrogate predictor when the observation of a predictor is missing. We used the permutation of out-of-bag predictor observations method in MATLAB (“oobPermutedPredictorImportance” function) to rank the importance of predictors (MathWorks, 2022). Drawing  $N$  observations out of  $N$  observations with replacement will on average leave 37% of observations not being used to train the model (Breiman, 1996). These observations are out-of-bag observations. For each predictor variable  $x_j$ , we randomly permuted the out-of-bag observations of  $x_j$ , used trained model to predict the response (response is not permuted), and estimated the model error  $\epsilon$ . This error was then compared with the model error of prediction using the unpermuted data. If the model performance significantly deteriorated when predictor  $j$  was permuted, then this variable is important. Otherwise this predictor variable is unimportant, or the information in this predictor variable has been contained in other predictor variables (McGovern et al., 2019). The higher the importance score is, the more important the factor is. Importance scores close to 0 mean low importance, and negative importance scores mean the model is accidentally better in using the permuted data to predict the response, which also means

the factor is not important. This is more likely to happen with relatively small datasets such as our  $F_p$  dataset ( $N = 112$  data points for the 2017 Northern California dataset and  $N = 88$  data points for the FIREX-AQ 2018 dataset, in which all predictor variables were measured).

## S6. Supplementary figures

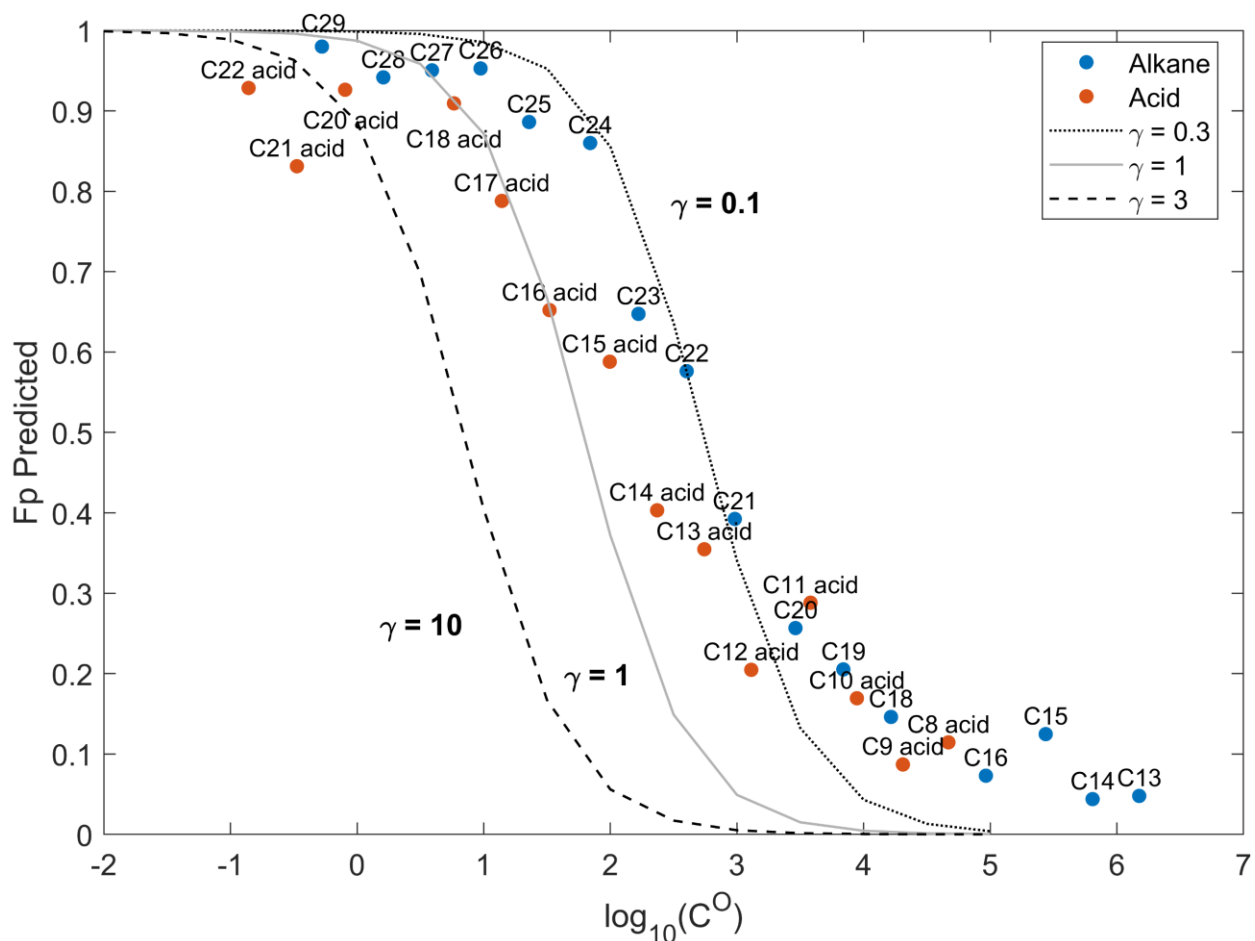

200 **Figure S3.** Measured and predicted  $F_p$  for  $n$ -alkanes and  $n$ -carboxylic acids, against the  $\log_{10}C^O$  at 298K in the 2017 Northern California wildfires study. C13-C15 alkanes deviate from others probably because of potential interference such as decomposition of larger molecules or the carryovers from the gas + particle measurements of the previous time step, which may have a stronger effect on the particle-phase measurements of the light alkanes (whose signals are low).

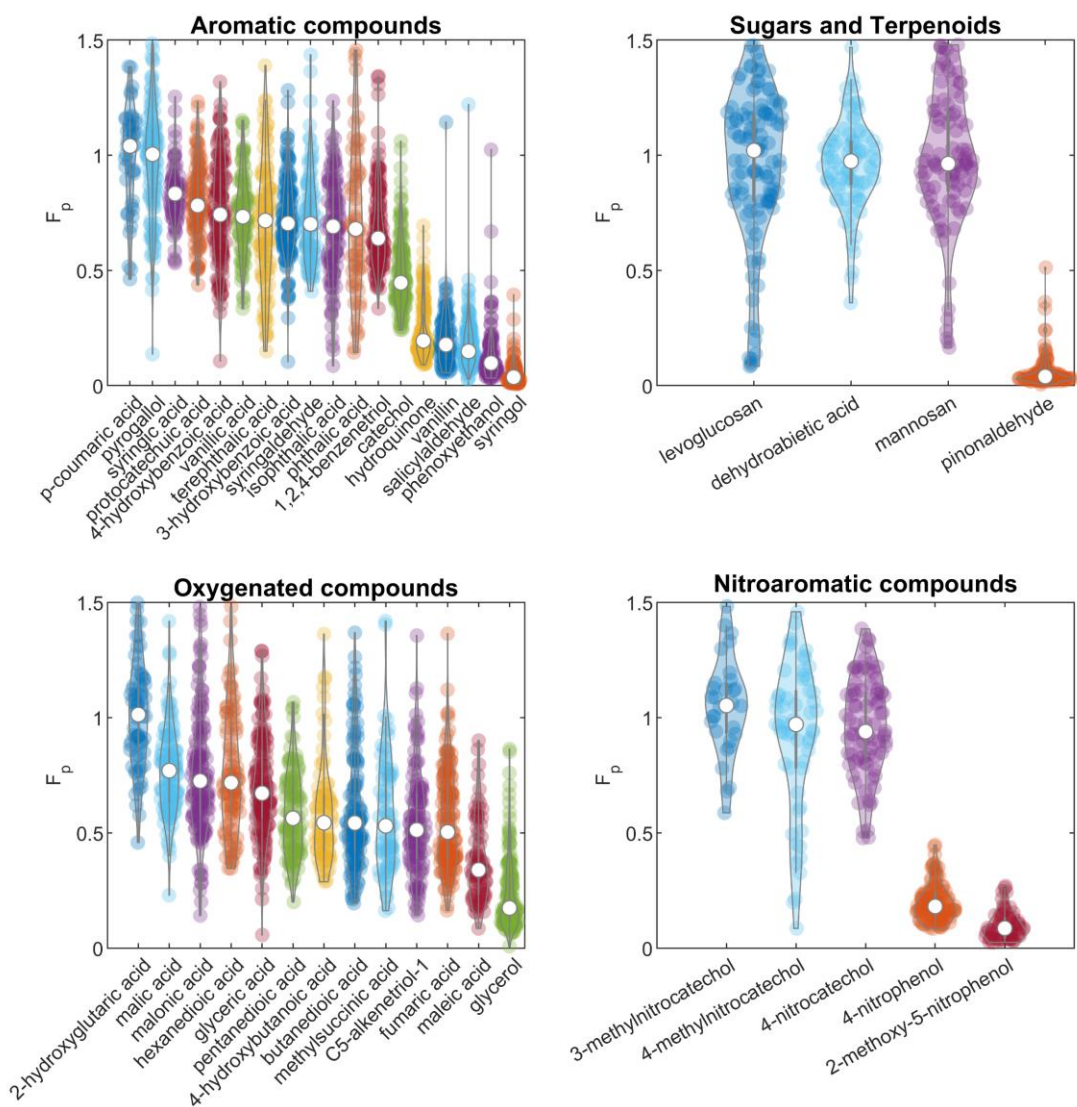

205 **Figure S4.** Violin plot of  $F_p$  of compounds in several classes in the 2017 Northern California wildfires study, showing interquartile range with whiskers extended to 1.5 times the interquartile range. Circles on each violin indicate the median. Compounds are ordered by descending median  $F_p$ .

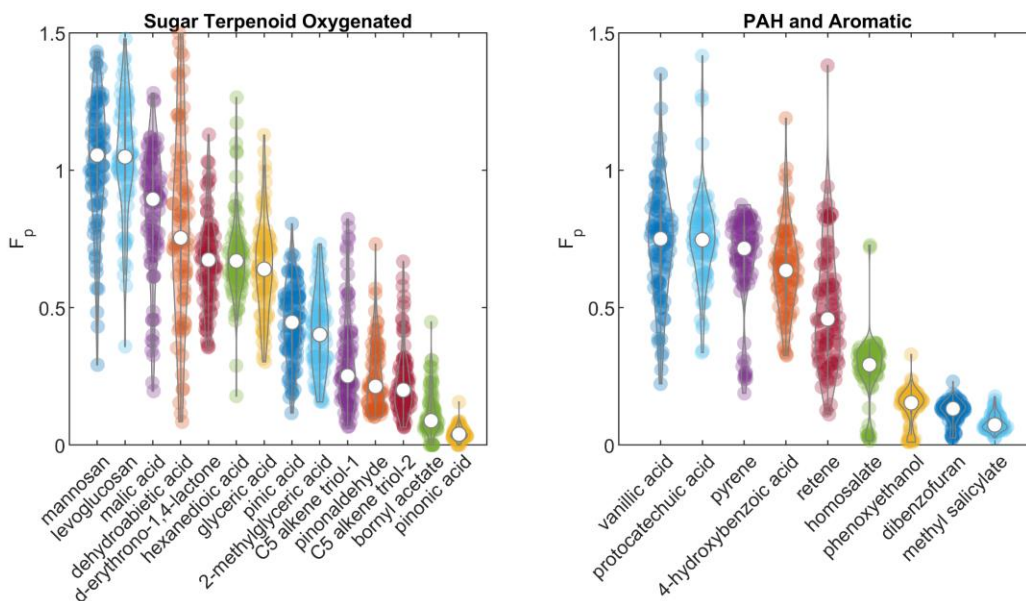

210 **Figure S5.** Violin plot of  $F_p$  of compounds in several classes in the FIREX-AQ 2018 study, showing interquartile range with whiskers extended to 1.5 times the interquartile range. Circles on each violin indicate the median. Compounds are ordered by descending median  $F_p$ .

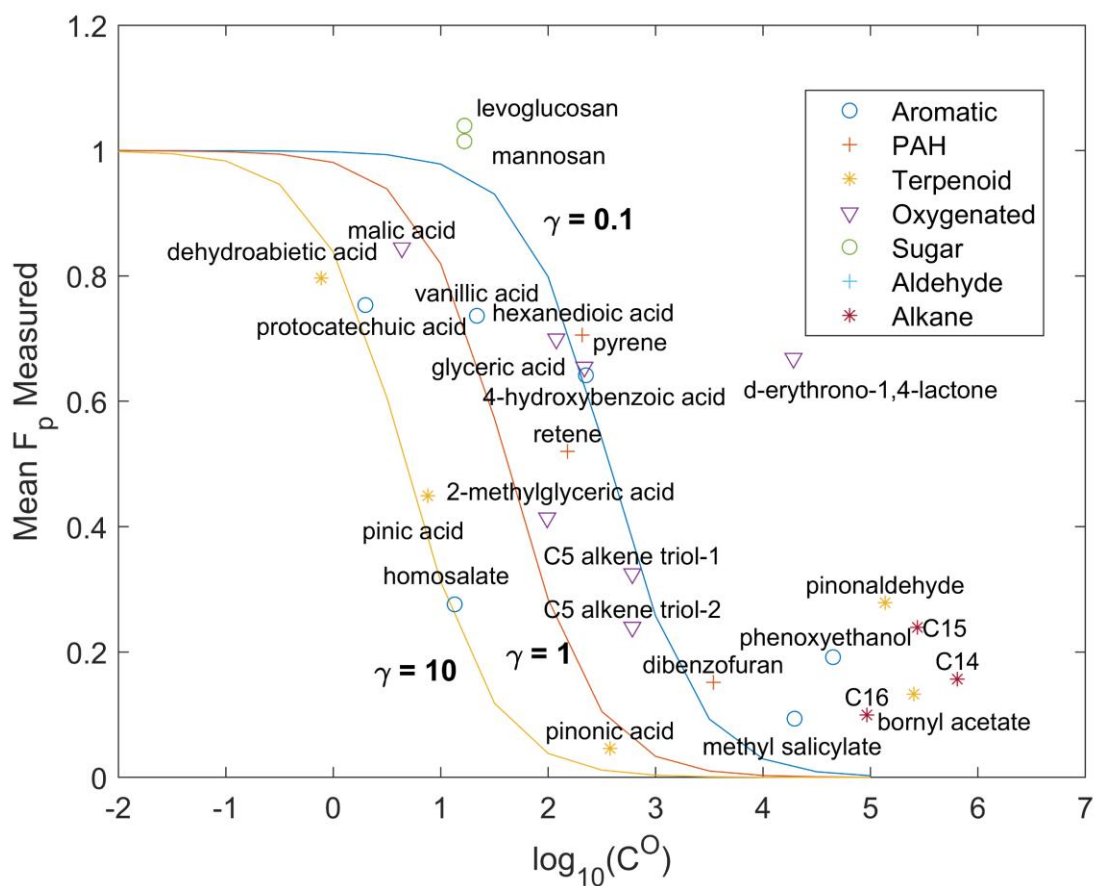

**Figure S6.** Campaign average  $F_p$  during the FIREX-AQ 2018 study, measured by the cTAG, classified by functional groups, plotted against their saturation concentration at 298K. Three curves on the figure are the theoretical particle fractions ( $F_p$ ) predict from equilibrium absorptive partitioning model, assuming different activity coefficients ( $\gamma$ ). The abnormally high  $F_p$  of d-erythrono-1,4-lactone (and its structure) suggests it is likely a fragmentation product of a lower volatility compound.

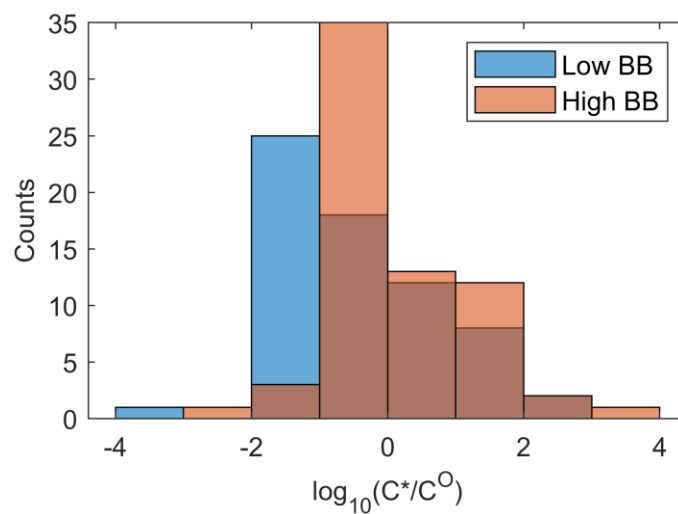

**Figure S7.** The logarithmic of effective saturation concentration over the pure saturation concentration, which is equivalent to the activity coefficient  $\gamma$ . Data are from the October 2017 Northern California wildfires campaign.

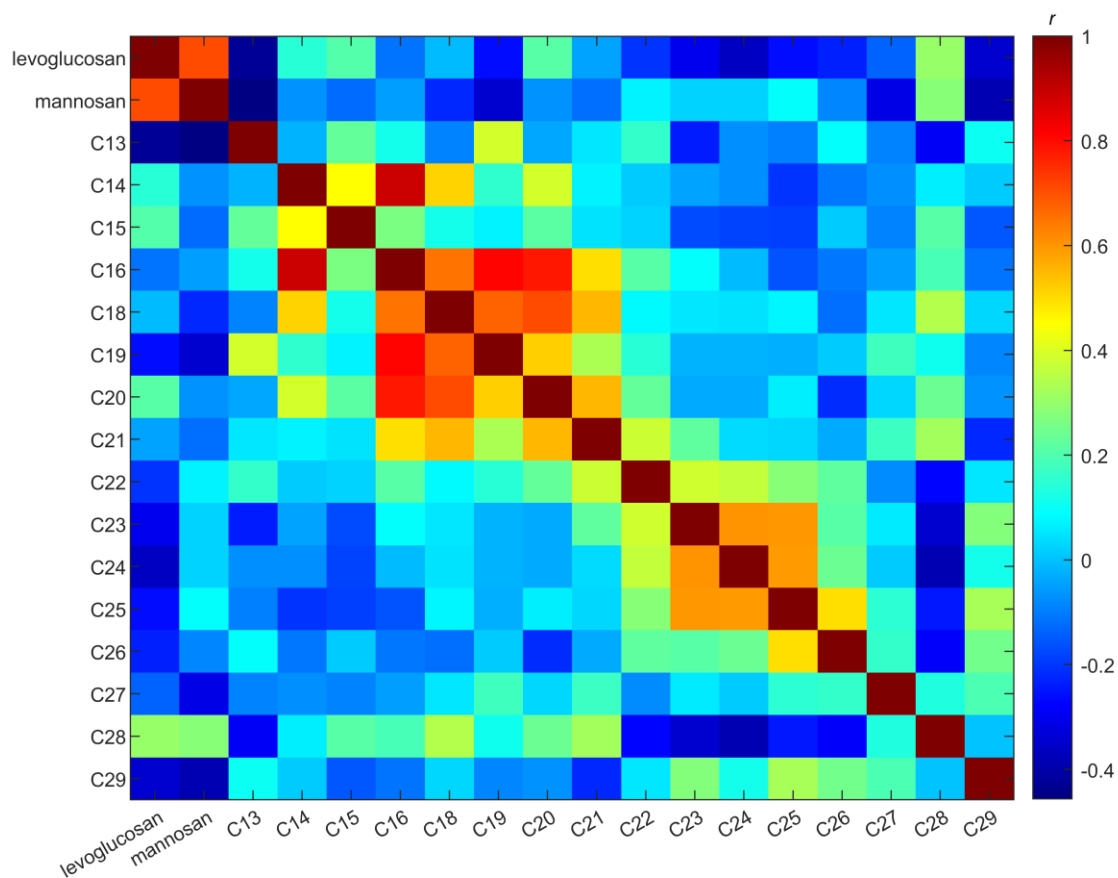

**Figure S8.** Correlation matrix of  $F_p$  time series for alkanes observed by SV-TAG in Berkeley, California during the October 2017 Northern California wildfires study.



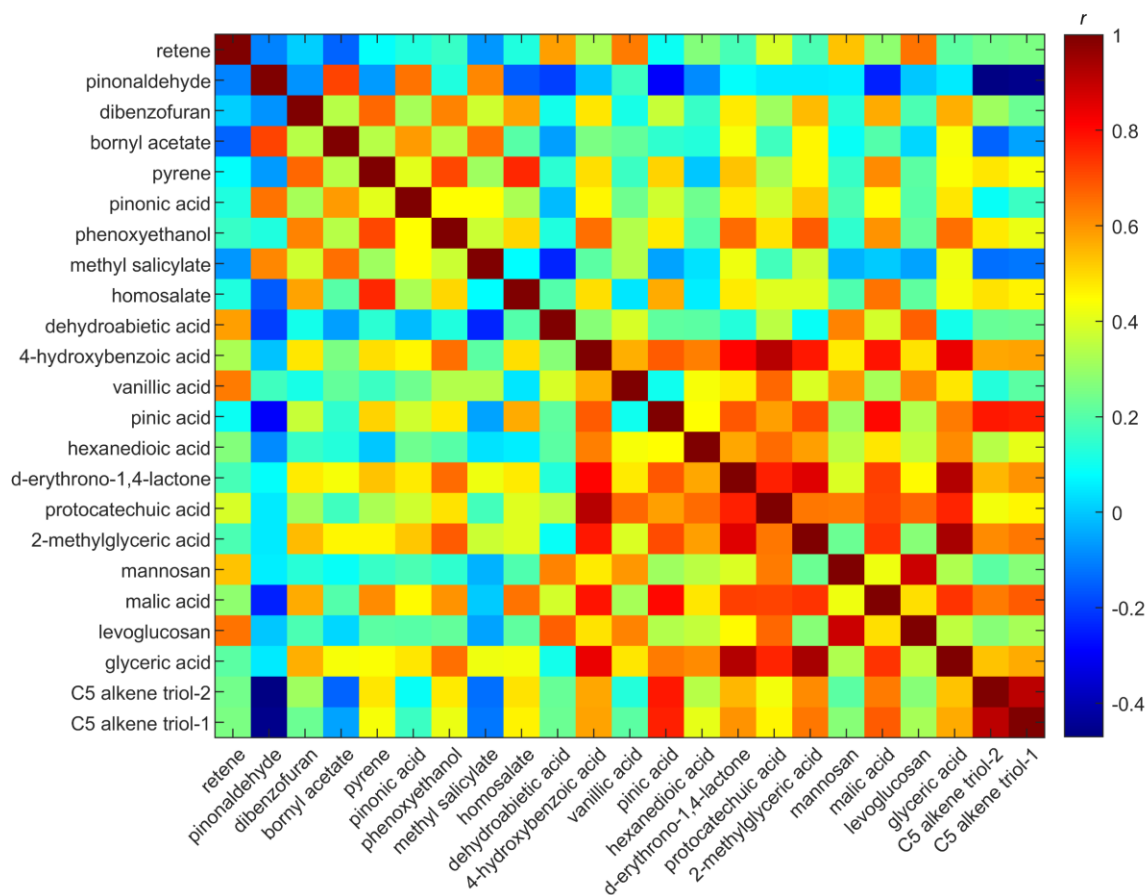

230 **Figure S9.** Correlation matrix of  $F_p$  time series for compounds observed by the cTAG in McCall, Idaho during the FIREX-AQ 2018 study. Compounds are ordered by the number of -OH groups in the molecules.

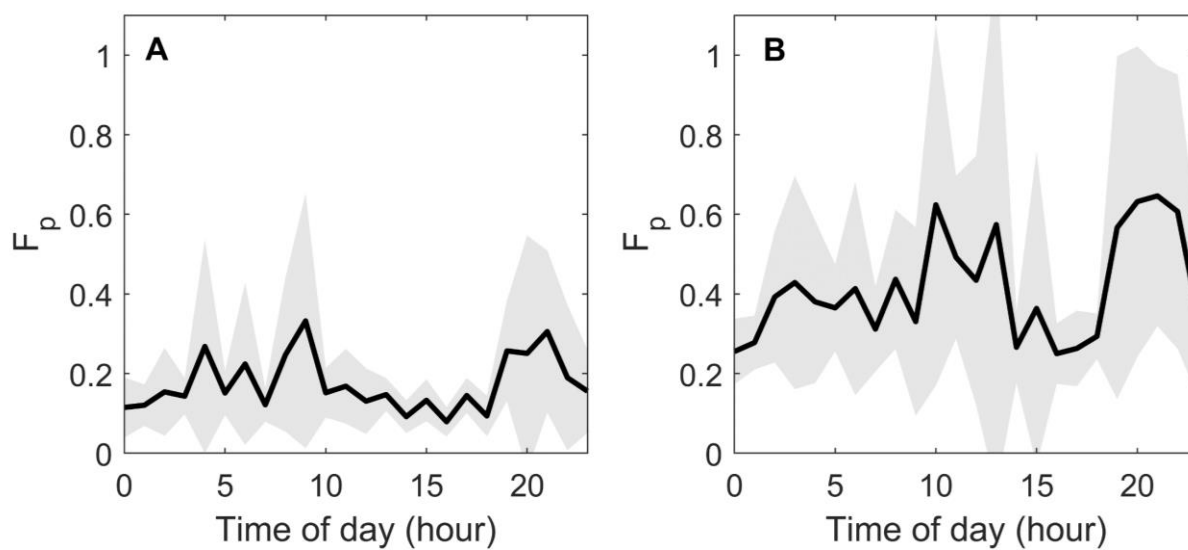

**Figure S10.** Diel profile of **A.** methyl palmitate and **B.** methyl stearate in Berkeley. Solid lines show the mean and shadings show the standard deviation.

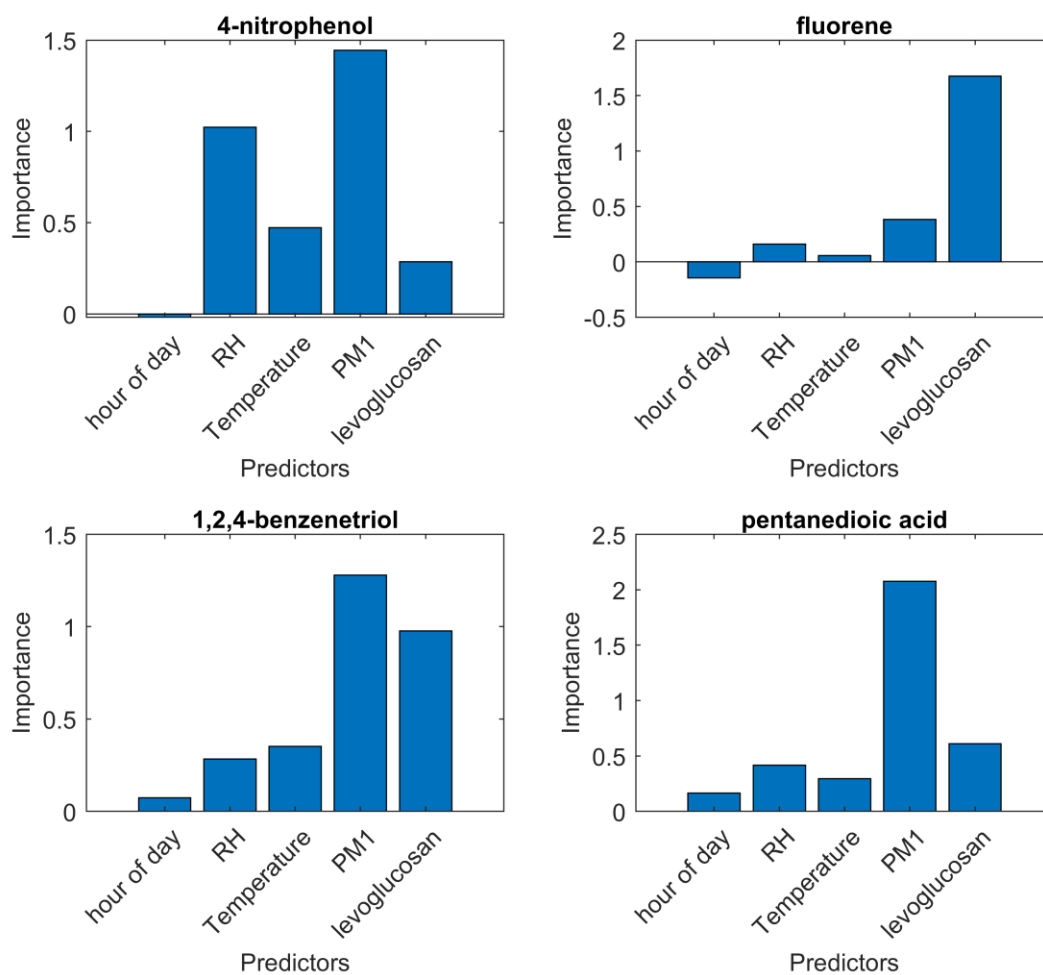

**Figure S11.** The importance scores of factors on the  $F_p$  of selected compounds, measured in the 2017 Northern California wildfires study.  $F_p$  of fluorene is negatively affected by the concentration of levoglucosan.  $F_p$  of all the compounds is positively affected by the concentration of PM<sub>1</sub>.

240

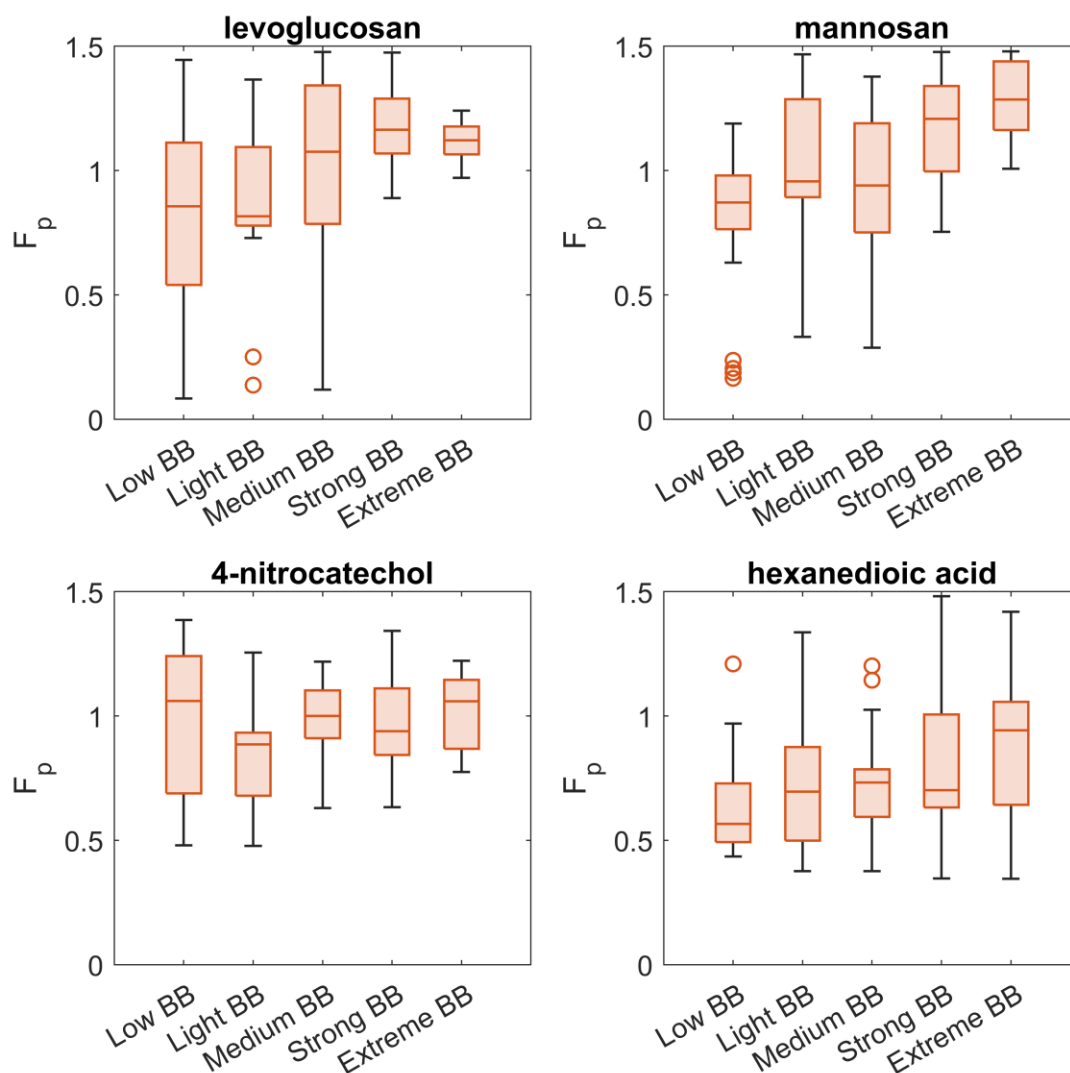

**Figure S12.** Boxplots showing the effect of BBOA on the particle phase fraction on selected polar compounds observed in the 2017 Northern California wildfires study. Each box plot shows the interquartile range with whiskers extended to  $1.5 \times$  the interquartile range. Central horizontal lines show the medians. Circles denote outliers.

245

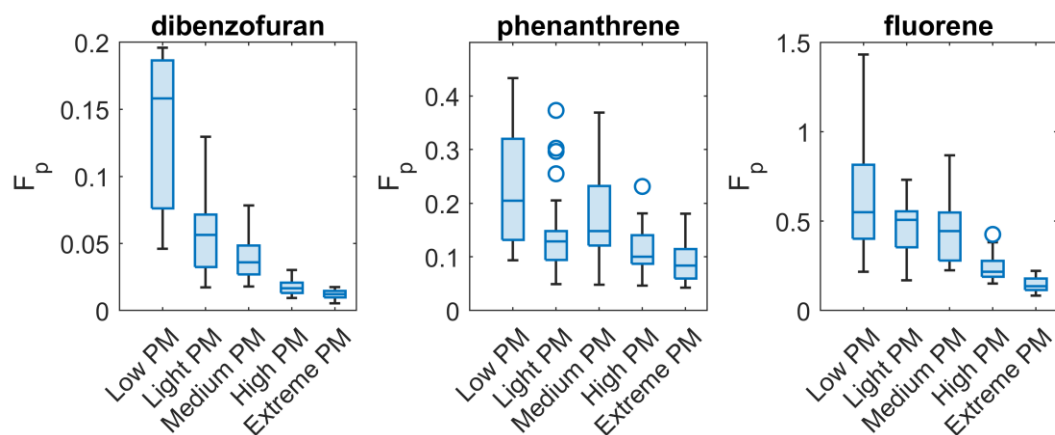

**Figure S13.** Boxplots showing the effect of BBOA on the particle phase fraction on selected polar compounds observed in the 2017 Northern California wildfires study. Each box plot shows the interquartile range with whiskers extended to  $1.5 \times$  the interquartile range. Central horizontal lines show the medians. Circles denote outliers. PM categories are based on the concentration of  $PM_{10}$ . Low  $PM_{10}$ : 0-40th percentile; light  $PM_{10}$ : 40th-60th percentile, medium  $PM_{10}$ : 60th-75th percentile, high to extreme  $PM_{10}$ : above 90th percentile of  $PM_{10}$  concentration.

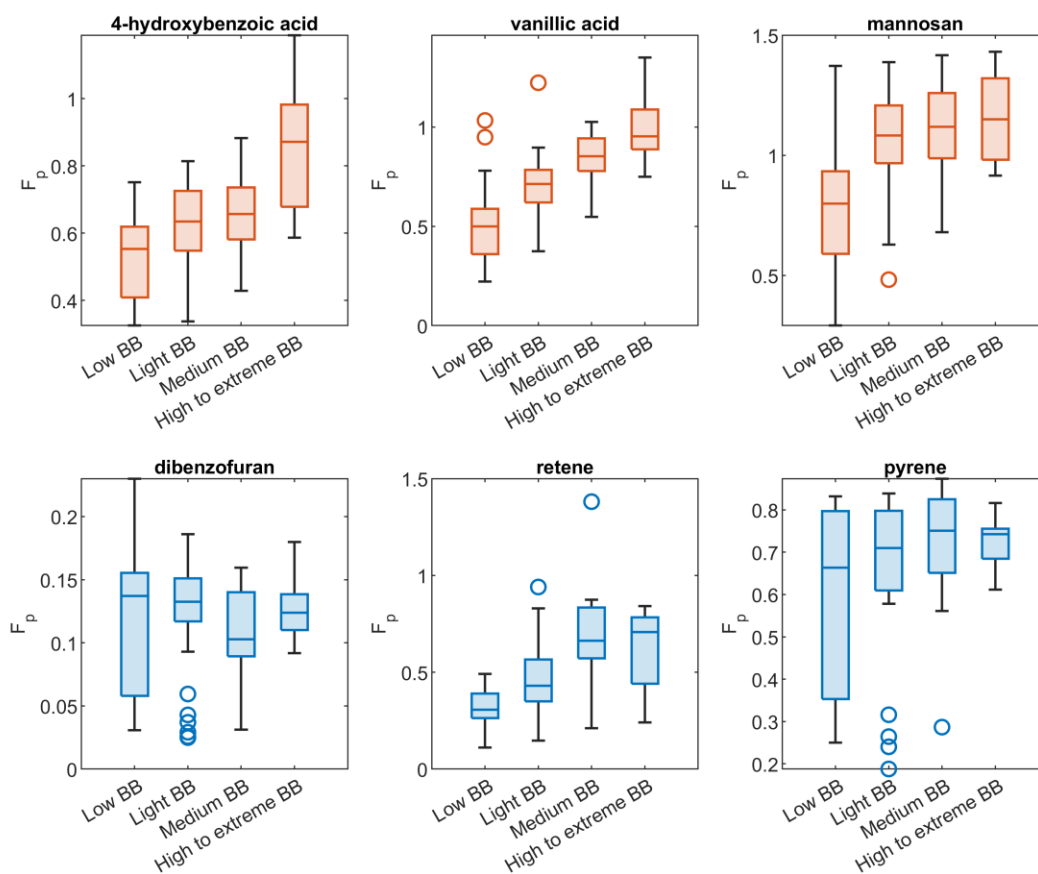

255

**Figure S14.** Boxplots showing the effect of BBOA on the particle phase fraction on selected compounds, observed in the FIREX-AQ 2018 study. Each box plot shows the interquartile range with whiskers extended to  $1.5 \times$  the interquartile range. Central horizontal lines show the medians. Circles denote outliers. BB influence categories are based on the concentration of particle phase levoglucosan. Low BB: 0-20th percentile; light BB: 20th-70th percentile, medium BB: 70th-90th percentile, high to extreme BB: above 90th percentile of levoglucosan concentration.

260

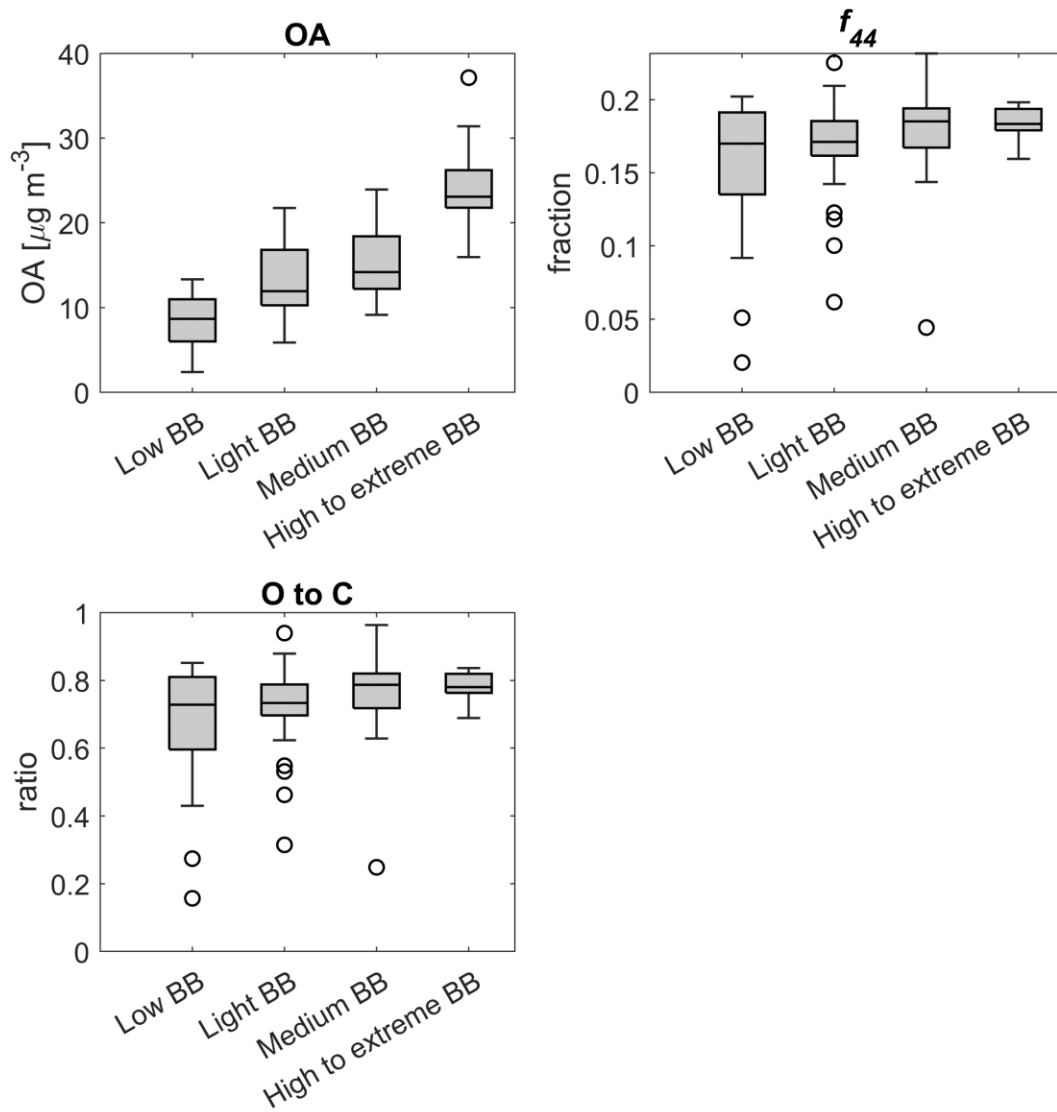

**Figure S15.** Boxplots showing the level of OA,  $f_{44}$ , and the estimated O/C ratio under different levels of biomass burning influence in the FIREX-AQ 2018 campaign.

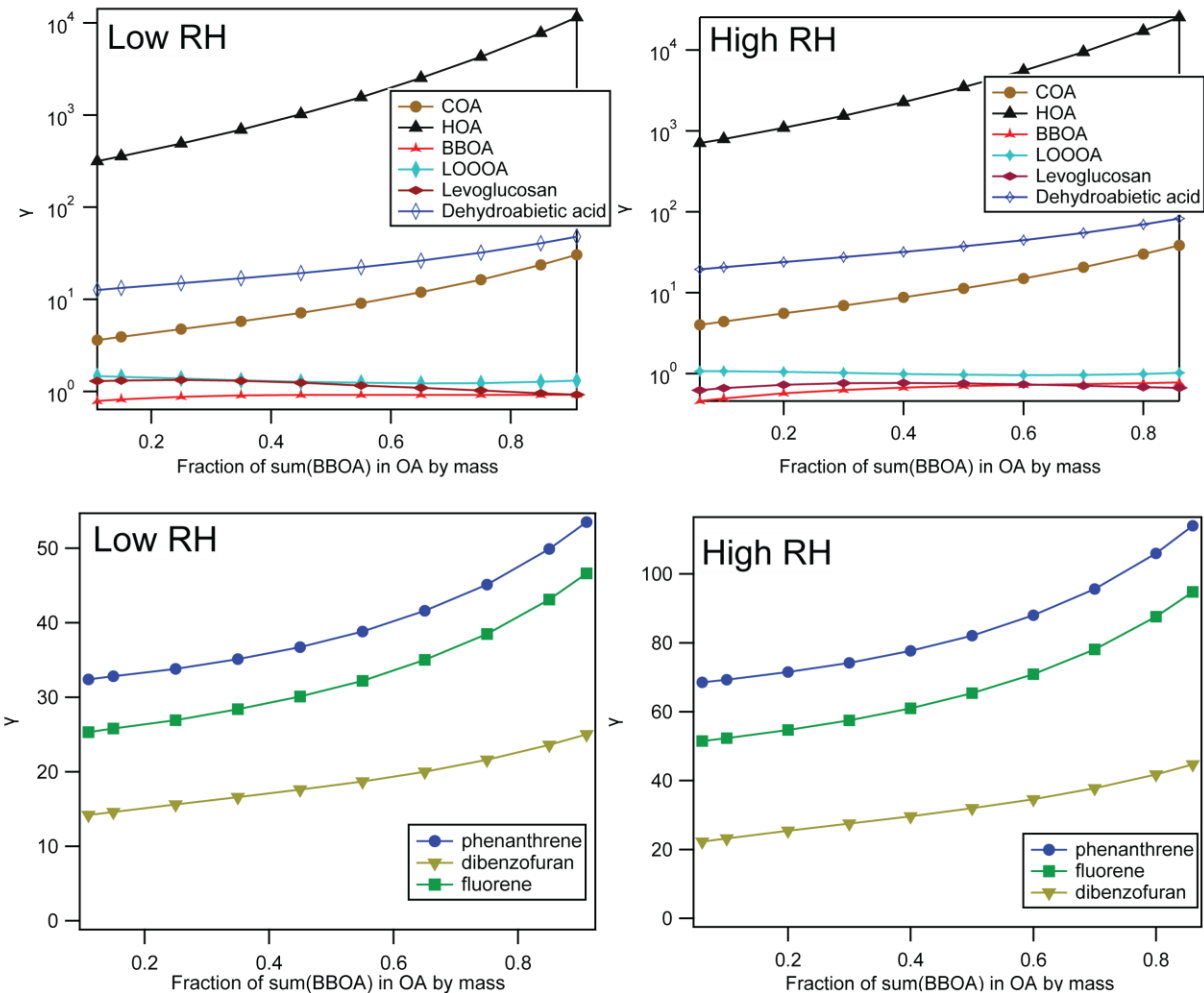

**Figure S16.** Predicted activity coefficients of aerosol components and selected compounds as functions of the fraction of the sum of BBOA components (BBOA without levoglucosan, levoglucosan and dehydroabietic acid), under low and high RH conditions described in Table S2.



## References

- Aiken, A. C., Decarlo, P. F., Kroll, J. H., Worsnop, D. R., Huffman, J. A., Docherty, K. S., Ulbrich, I. M., Mohr, C., Kimmel, J. R., Sueper, D., Sun, Y., Zhang, Q., Trimborn, A., Northway, M., Ziemann, P. J., Canagaratna, M. R., Onasch, T. B., Alfarra, M. R., Prevot, A. S. H., Dommen, J., Duplissy, J., Metzger, A., Baltensperger, U., and Jimenez, J. L.: O/C and OM/OC ratios of primary, secondary, and ambient organic aerosols with high-resolution time-of-flight aerosol mass spectrometry, *Environ. Sci. Technol.*, 42, 4478–4485, <https://doi.org/10.1021/es703009q>, 2008.
- 275
- Bannan, T. J., Booth, A. M., Jones, B. T., O’Meara, S., Barley, M. H., Riipinen, I., Percival, C. J., and Topping, D.: Measured Saturation Vapor Pressures of Phenolic and Nitro-aromatic Compounds, *Environ. Sci. Technol.*, 51, 3922–3928, <https://doi.org/10.1021/acs.est.6b06364>, 2017.
- 280
- Breiman, L.: Out-of-Bag Estimation, 1996.
- Breiman, L.: Random Forests, *Mach. Learn.*, 45, 5–32, <https://doi.org/10.1023/A:1010933404324>, 2001.
- 285
- Compernelle, S., Ceulemans, K., and Müller, J. F.: Evaporation: A new vapour pressure estimation method for organic molecules including non-additivity and intramolecular interactions, *Atmos. Chem. Phys.*, 11, 9431–9450, <https://doi.org/10.5194/acp-11-9431-2011>, 2011.
- 290
- Engelhart, G. J., Hennigan, C. J., Miracolo, M. A., Robinson, A. L., and Pandis, S. N.: Cloud condensation nuclei activity of fresh primary and aged biomass burning aerosol, *Atmos. Chem. Phys.*, 12, 7285–7293, <https://doi.org/10.5194/ACP-12-7285-2012>, 2012.
- Epstein, S. A., Riipinen, I., and Donahue, N. M.: A Semiempirical Correlation between Enthalpy of Vaporization and Saturation Concentration for Organic Aerosol, *Environ. Sci. Technol.*, 44, 743–748, <https://doi.org/10.1021/es902497z>, 2010.
- 295
- Faber, P., Drewnick, F., Bierl, R., and Borrmann, S.: Complementary online aerosol mass spectrometry and offline FT-IR spectroscopy measurements: Prospects and challenges for the

analysis of anthropogenic aerosol particle emissions, *Atmos. Environ.*, 166, 92–98, <https://doi.org/10.1016/j.atmosenv.2017.07.014>, 2017.

300 Fountoukis, C. and Nenes, A.: ISORROPIAII: A computationally efficient thermodynamic equilibrium model for  $\text{K}^+$ - $\text{Ca}^{2+}$ - $\text{Mg}^{2+}$ - $\text{NH}_4^+$ - $\text{Na}^+$ - $\text{SO}_4^{2-}$ - $\text{NO}_3^-$ - $\text{Cl}^-$ - $\text{H}_2\text{O}$  aerosols, *Atmos. Chem. Phys.*, 7, 4639–4659, <https://doi.org/10.5194/acp-7-4639-2007>, 2007.

Guo, H., Xu, L., Bougiatioti, A., Cerully, K. M., Capps, S. L., Hite, J. R., Carlton, A. G., Lee, S. H., Bergin, M. H., Ng, N. L., Nenes, A., and Weber, R. J.: Fine-particle water and pH in the  
305 southeastern United States, *Atmos. Chem. Phys.*, 15, 5211–5228, <https://doi.org/10.5194/acp-15-5211-2015>, 2015.

Isaacman-VanWertz, G., Yee, L. D., Kreisberg, N. M., Wernis, R., Moss, J. A., Hering, S. V., De Sá, S. S., Martin, S. T., Alexander, M. L., Palm, B. B., Hu, W., Campuzano-Jost, P., Day, D. A., Jimenez, J. L., Riva, M., Surratt, J. D., Viegas, J., Manzi, A., Edgerton, E., Baumann, K., Souza,  
310 R., Artaxo, P., and Goldstein, A. H.: Ambient Gas-Particle Partitioning of Tracers for Biogenic Oxidation, *Environ. Sci. Technol.*, 50, 9952–9962, <https://doi.org/10.1021/acs.est.6b01674>, 2016.

Isaacman-VanWertz, G., Sueper, D. T., Aikin, K. C., Lerner, B. M., Gilman, J. B., de Gouw, J. A., Worsnop, D. R., and Goldstein, A. H.: Automated single-ion peak fitting as an efficient  
315 approach for analyzing complex chromatographic data, *J. Chromatogr. A*, 1529, 81–92, <https://doi.org/10.1016/j.chroma.2017.11.005>, 2017.

Isaacman, G., Kreisberg, N. M., Yee, L. D., Worton, D. R., Chan, A. W. H., Moss, J. A., Hering, S. V., and Goldstein, A. H.: Online derivatization for hourly measurements of gas- and particle-phase semi-volatile oxygenated organic compounds by thermal desorption aerosol gas  
320 chromatography (SV-TAG), *Atmos. Meas. Tech.*, 7, 4417–4429, <https://doi.org/10.5194/amt-7-4417-2014>, 2014.

Jen, C. N., Hatch, L. E., Selimovic, V., Yokelson, R. J., Weber, R., Fernandez, A. E., Kreisberg, N. M., Barsanti, K. C., and Goldstein, A. H.: Speciated and total emission factors of particulate organics from burning western US wildland fuels and their dependence on combustion  
325 efficiency, *Atmos. Chem. Phys.*, 19, 1013–1026, <https://doi.org/10.5194/acp-19-1013-2019>,

2019.

Kreisberg, N. M., Worton, D. R., Zhao, Y., Isaacman, G., Goldstein, A. H., and Hering, S. V.: Development of an automated high-temperature valveless injection system for online gas chromatography, *Atmos. Meas. Tech.*, 7, 4431–4444, <https://doi.org/10.5194/amt-7-4431-2014>,  
330 2014.

Liang, Y., Jen, C. N., Weber, R. J., Misztal, P. K., and Goldstein, A. H.: Chemical composition of PM<sub>2.5</sub> in October 2017 Northern California wildfire plumes, *Atmos. Chem. Phys.*, 21, 5719–5737, <https://doi.org/10.5194/acp-21-5719-2021>, 2021.

MathWorks: Predictor importance estimates by permutation of out-of-bag predictor observations for random forest of regression trees - MATLAB, 2022.  
335

May, A. A., Saleh, R., Hennigan, C. J., Donahue, N. M., and Robinson, A. L.: Volatility of organic molecular markers used for source apportionment analysis: Measurements and implications for atmospheric lifetime, *Environ. Sci. Technol.*, 46, 12435–12444, <https://doi.org/10.1021/es302276t>, 2012.

340 May, A. A., Levin, E. J. T., Hennigan, C. J., Riipinen, I., Lee, T., Collett, J. L., Jimenez, J. L., Kreidenweis, S. M., and Robinson, A. L.: Gas-particle partitioning of primary organic aerosol emissions: 3. Biomass burning, *J. Geophys. Res. Atmos.*, 118, 11327–11338, <https://doi.org/10.1002/jgrd.50828>, 2013.

McGovern, A., Lagerquist, R., John Gagne, D., Jergensen, G. E., Elmore, K. L., Homeyer, C. R.,  
345 and Smith, T.: Making the Black Box More Transparent: Understanding the Physical Implications of Machine Learning, *Bull. Am. Meteorol. Soc.*, 100, 2175–2199, <https://doi.org/10.1175/BAMS-D-18-0195.1>, 2019.

Mecikalski, J. R., Sandmæl, T. N., Murillo, E. M., Homeyer, C. R., Bedka, K. M., Apke, J. M., and Jewett, C. P.: A Random-Forest Model to Assess Predictor Importance and Nowcast Severe  
350 Storms Using High-Resolution Radar–GOES Satellite–Lightning Observations, *Mon. Weather Rev.*, 149, 1725–1746, <https://doi.org/10.1175/MWR-D-19-0274.1>, 2021.

Ng, N. L., Canagaratna, M. R., Jimenez, J. L., Chhabra, P. S., Seinfeld, J. H., and Worsnop, D.

- R.: Changes in organic aerosol composition with aging inferred from aerosol mass spectra, *Atmos. Chem. Phys.*, 11, 6465–6474, <https://doi.org/10.5194/acp-11-6465-2011>, 2011.
- 355 NIST Chemistry WebBook: <https://webbook.nist.gov/>, last access: 2 October 2022.
- Pankow, J. F. and Asher, W. E.: SIMPOL.1: A simple group contribution method for predicting vapor pressures and enthalpies of vaporization of multifunctional organic compounds, *Atmos. Chem. Phys.*, 8, 2773–2796, <https://doi.org/10.5194/acp-8-2773-2008>, 2008.
- Pye, H. O. T., Zuend, A., Fry, J. L., Isaacman-VanWertz, G., Capps, S. L., Appel, K. W.,  
360 Foroutan, H., Xu, L., Ng, N. L., and Goldstein, A. H.: Coupling of organic and inorganic aerosol systems and the effect on gas-particle partitioning in the southeastern US, *Atmos. Chem. Phys.*, 18, 357–370, <https://doi.org/10.5194/acp-18-357-2018>, 2018.
- Shah, R. U., Robinson, E. S., Gu, P., Robinson, A. L., Apte, J. S., and Presto, A. A.: High-spatial-resolution mapping and source apportionment of aerosol composition in Oakland,  
365 California, using mobile aerosol mass spectrometry, *Atmos. Chem. Phys.*, 18, 16325–16344, <https://doi.org/10.5194/acp-18-16325-2018>, 2018.
- Thornton, J. A., Mohr, C., Schobesberger, S., D’Ambro, E. L., Lee, B. H., and Lopez-Hilfiker, F. D.: Evaluating Organic Aerosol Sources and Evolution with a Combined Molecular Composition and Volatility Framework Using the Filter Inlet for Gases and Aerosols (FIGAERO), *Acc. Chem. Res.*, 53, 1415–1426, <https://doi.org/10.1021/acs.accounts.0c00259>, 2020.  
370
- US EPA: Estimation Programs Interface Suite™ for Microsoft® Windows, 2012.
- Wania, F., Awonaike, B., and Goss, K. U.: Comment on “measured Saturation Vapor Pressures of Phenolic and Nitro-Aromatic Compounds,” *Environ. Sci. Technol.*, 51, 7742–7743, <https://doi.org/10.1021/acs.est.7b02079>, 2017.
- 375 Yee, L. D., Isaacman-VanWertz, G., Wernis, R. A., Meng, M., Rivera, V., Kreisberg, N. M., Hering, S. V., Bering, M. S., Glasius, M., Upshur, M. A., Gray Bé, A., Thomson, R. J., Geiger, F. M., Offenberg, J. H., Lewandowski, M., Kourtchev, I., Kalberer, M., De Sá, S., Martin, S. T., Alexander, M. L., Palm, B. B., Hu, W., Campuzano-Jost, P., Day, D. A., Jimenez, J. L., Liu, Y., McKinney, K. A., Artaxo, P., Viegas, J., Manzi, A., Oliveira, M. B., De Souza, R., Machado, L.

380 A. T., Longo, K., and Goldstein, A. H.: Observations of sesquiterpenes and their oxidation products in central Amazonia during the wet and dry seasons, *Atmos. Chem. Phys.*, 18, 10433–10457, <https://doi.org/10.5194/acp-18-10433-2018>, 2018.

Zhang, H., Yee, L. D., Lee, B. H., Curtis, M. P., Worton, D. R., Isaacman-VanWertz, G., Offenberg, J. H., Lewandowski, M., Kleindienst, T. E., Beaver, M. R., Holder, A. L., Lonneman, 385 W. A., Docherty, K. S., Jaoui, M., Pye, H. O. T., Hu, W., Day, D. A., Campuzano-Jost, P., Jimenez, J. L., Guo, H., Weber, R. J., de Gouw, J., Koss, A. R., Edgerton, E. S., Brune, W., Mohr, C., Lopez-Hilfiker, F. D., Lutz, A., Kreisberg, N. M., Spielman, S. R., Hering, S. V., Wilson, K. R., Thornton, J. A., and Goldstein, A. H.: Monoterpenes are the largest source of summertime organic aerosol in the southeastern United States, *Proc. Natl. Acad. Sci. U. S. A.*, 390 115, 2038–2043, <https://doi.org/10.1073/pnas.1717513115>, 2018.

Zhang, Q., Jimenez, J. L., Worsnop, D. R., and Canagaratna, M.: A case study of urban particle acidity and its influence on secondary organic aerosol, *Environ. Sci. Technol.*, 41, 3213–3219, <https://doi.org/10.1021/es061812j>, 2007.

Zuend, A., Marcolli, C., Booth, A. M., Lienhard, D. M., Soonsin, V., Krieger, U. K., Topping, D. 395 O., McFiggans, G., Peter, T., and Seinfeld, J. H.: New and extended parameterization of the thermodynamic model AIOMFAC: Calculation of activity coefficients for organic-inorganic mixtures containing carboxyl, hydroxyl, carbonyl, ether, ester, alkenyl, alkyl, and aromatic functional groups, *Atmos. Chem. Phys.*, 11, 9155–9206, <https://doi.org/10.5194/acp-11-9155-2011>, 2011.

400
